# Supplementary material for: Scalable synthesis of dispersible iron carbide (Fe3C) nanoparticles by ‘nanocasting’
Source: Royal Society of Chemistry journal article supplement (doi:10.1039/c9ta06876g), 2019-01-01
Supplement: c9ta06876g1.pdf [file c9ta06876g1.pdf]

## Scalable synthesis of dispersible iron carbide ( $\text{Fe}_3\text{C}$ ) nanoparticles by 'nanocasting': Supplementary Information

D. C. Fletcher,<sup>1</sup> R. Hunter,<sup>1</sup> W. Xia,<sup>2</sup> G.-J. Smales,<sup>3</sup> B. R. Pauw,<sup>3</sup> E. Blackburn,<sup>4</sup> A. Kulak,<sup>5</sup> Huolin Xin,<sup>6</sup> Z. Schnepf\*<sup>1</sup>

1. School of Chemistry, University of Birmingham, Birmingham B152TT, UK
2. Center for Functional Nanomaterials, Brookhaven National Laboratory, Upton, NY, 11973-5000, USA
3. Bundesanstalt für Materialforschung und -prüfung (BAM), Unter den Eichen 87, 12205 Berlin, Germany
4. School of Physics and Astronomy, University of Birmingham, Birmingham B152TT, UK
5. School of Chemistry, University of Leeds, Leeds, LS29JT, UK
6. School of Physical Sciences, University of California, Irvine, CA 92697

### 1. Experimental Details

#### 1.1 Synthesis of $\text{MgO}/\text{Fe}_3\text{C}$ composites

Prussian blue nanoparticles were prepared by dissolving  $\text{FeCl}_2 \cdot 4\text{H}_2\text{O}$  (0.6 g) and polyvinylpyrrolidone (1:1 molar ratio) in deionised water (240 ml). Separately,  $\text{K}_3[\text{Fe}(\text{CN})_6]$  (0.99 g) was dissolved in deionised water (60 ml) and the resulting solution added dropwise to the  $\text{FeCl}_2$  solution with vigorous stirring. The solution was stirred for a further 30 minutes then acetone (300 ml) added to induce agglomeration of the Prussian blue particles. The particles were washed three times with acetone via centrifugation and the dark blue solid transferred into methanol (300 ml).  $\text{MgO}$  nanopowder (Sigma Aldrich 549649 <50 nm) was added to give a 1:1 mass ratio of Prussian blue to  $\text{MgO}$  and the mixture stirred thoroughly before removing the methanol by rotary evaporation. The pale blue solid was further dried at 70 °C in air for 24 hours. To prepare  $\text{MgO}/\text{Fe}_3\text{C}$  nanoparticle composites, the Prussian blue/ $\text{MgO}$  mixture was heated at 5 °C/min to 800 °C under  $\text{N}_2$  in a tube furnace with 1 hour hold.

The large scale synthesis of  $\text{Fe}_3\text{C}$  nanoparticles was carried out by mixing commercial soluble Prussian blue (Sigma Aldrich 03899) with  $\text{MgO}$  nanopowder (Sigma Aldrich 549649) in a pestle and mortar. The pale blue mixture was transferred to a crucible and heated at 5 °C/min to 800 °C under  $\text{N}_2$  in a tube furnace with 1 hour hold.

#### 1.2 Washing $\text{MgO}/\text{Fe}_3\text{C}$ samples with ethylenediamine tetraacetic acid (EDTA)

To isolate dispersible  $\text{Fe}_3\text{C}$  nanoparticles, the  $\text{MgO}$  was removed from  $\text{MgO}/\text{Fe}_3\text{C}$  samples by washing with aqueous EDTA. In this paper, the  $\text{MgO}/\text{Fe}_3\text{C}$  solid was treated by stirring overnight in 0.2 M aqueous EDTA (7% molar excess relative to  $\text{MgO}$  content) followed by washing the sample three times with deionised water and ethanol using centrifugation. The resulting solid was dried in air for 24 hours at room temperature. Atomic absorption spectroscopy of the supernatant solution from the final water wash showed a Mg content of 2% (by mass). A higher concentration of EDTA can be used to reduce this to <0.1% but this was observed by X-ray diffraction to dissolve a significant amount of  $\text{Fe}_3\text{C}$ . Aqueous HCl should not be used to remove  $\text{MgO}$  in this system as it either produces  $\text{Mg}(\text{OH})_2$  or, if more concentrated, results in  $\text{Fe}_3\text{C}$  dissolution.

### 1.3 Hydrogen peroxide to remove amorphous carbon

0.2 g of Fe<sub>3</sub>C/C sample was added to hydrogen peroxide (H<sub>2</sub>O<sub>2</sub>) solution (20 ml) and the mixture stirred for 2 hours. The hydrogen peroxide concentrations used were 0%, 0.1%, 1%, 5% and 10%. The resulting suspensions were separated by centrifuging for 5 minutes at 10000 rpm and the supernatant decanted for analysis. The solid samples were washed with water then dried overnight under vacuum at 70 °C.

### 1.4 Preparation of a ferrofluid

For preparation of a ferrofluid, commercial soluble Prussian blue ((KFe<sup>III</sup>[Fe<sup>II</sup>(CN)<sub>6</sub>], 7.5 g, Sigma Aldrich 03899) was ground in a pestle and mortar with commercial MgO nanopowder (Sigma Aldrich 549649 <50 nm, 7.5 g). Note that 'soluble' Prussian blue is not truly soluble but is in a nanoparticle form that can be used to prepare colloidal suspensions in water. The resulting pale blue powder was pyrolyzed and washed with EDTA as above. A ferrofluid was prepared by sonicating the resulting Fe<sub>3</sub>C nanoparticle powder (0.1 g) in DI water (5 ml) and oleic acid (0.16 ml) for 1 hour. The black powder collected as a suspension in the oleic acid layer, which was separated from the water layer using a SmCo<sub>26</sub> magnet. The black fluid was washed three times with ethanol and then three times with kerosene, collecting each time using magnetic separation.

### 1.5 Dispersion of Fe<sub>3</sub>C nanoparticles on a support

For dispersion of particles on a silica support, a Fe<sub>3</sub>C/MgO mixture was prepared from as-synthesized Prussian blue with MgO nanopowder then washed with EDTA and H<sub>2</sub>O<sub>2</sub> as described above. 3 mg of the resulting black powder was dispersed by sonication for 30 minutes in 300 µl deionised water with Cetyltrimethylammonium bromide (CTAB) surfactant (0.03 mg). The resulting solution was sonicated for 30 minutes with 0.1 g silica (a standard support material kindly provided by Johnson-Matthey) then dried at room temperature for 24 hours.

### 1.6 SAXS/WAXS

SAXS/WAXS measurements were done using the Multiscale Analyser for Ultrafine Structures (MAUS): a heavily customized Xeuss 2.0 (Xenocs, France), installed at the Bundesanstalt für Materialforschung und -prüfung, Berlin. The MAUS uses X-rays from microfocus X-ray tubes, followed by a multilayer optics to parallelize and monochromatize the X-ray beams to a wavelength of  $\lambda_{\text{Cu}}=0.154$  nm for the copper source, and  $\lambda_{\text{Mo}}=0.071$  nm for the molybdenum source. These are collimated using three sets of scatterless slits (two germanium and one silicon, with the latter virtually transparent to molybdenum radiation, but very effective for the copper radiation). The detector is an in-vacuum Dectris Eiger R 1M on a motorized platform, for this investigation placed at distances of ranging from 70 - 2500 mm from the sample (after correction, the data from the different distances and different sources overlap to form a single curve). The sample-to-detector distance is traceably calibrated using a triangulation method, double-checked with interferometer strip readings. The space between the start of the collimation until the detector is a continuous, uninterrupted vacuum to reduce background. The powders were mounted in a flat sample holder, between two pieces of scotch magic tape. By using both photon energies over a range of overlapping sample-to-detector distances, a very wide range in scattering angles is covered, and the low (but measurable) fluorescence from the iron-containing samples is avoided. The resulting data has been processed using the DAWN software package,<sup>1,2</sup> with the following processing steps in order: masking, correction for counting time, dark-current, transmission, primary beam flux, background (no sample in the beam), detector efficiency, flat-field, and solid angle, followed by a thickness correction and azimuthal averaging. The apparent sample thickness was estimated by using the sample absorption, composition and gravimetric density, allowing the data to be scaled to absolute units in combination with the flux and transmission corrections using the full beam on the

Eiger detector. Scaling of the individual datasets from the various distances and sources to achieve overlap was, by virtue of these corrections, rendered unnecessary. Photon counting uncertainties were propagated through the correction steps.

### 1.7 Other instrumentation

X-ray diffraction was carried out on a Panalytical Empyrean with a Copper X-ray source. HAADF images, EDS mapping and electron tomography was carried out on an FEI Talos F200X Scanning Transmission Electron Microscope. Other TEM images were acquired on a JEOL 2100F TEM.

## 2. Supplementary Results and Discussion

### 2.1 Control sample

A TEM image of a sample of  $\text{Fe}_3\text{C}$  (confirmed by XRD – not shown) produced by heating Prussian Blue without an MgO cast) is shown in Figure S1.

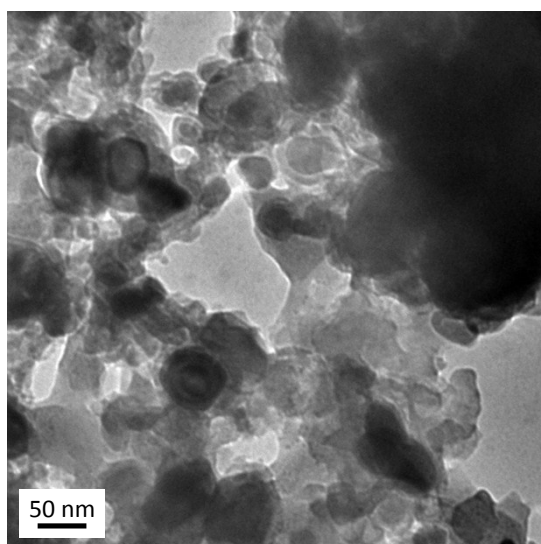

**Figure S1** TEM image of a control sample of Prussian Blue heated to 800 °C without MgO.

### 2.2 Removal of excess carbon from the sample using hydrogen peroxide ( $\text{H}_2\text{O}_2$ )

X-ray diffraction patterns of samples before and after washing with various concentrations of  $\text{H}_2\text{O}_2$  are shown in Figure S1. The absence of peaks for iron oxide phases, and the presence of the iron carbide peaks in all samples suggests that the  $\text{Fe}_3\text{C}$  is protected from the  $\text{H}_2\text{O}_2$  by the graphitic carbon shells. Atomic adsorption spectroscopy was used to probe the iron content of the  $\text{H}_2\text{O}_2$  solutions after they had been used to wash the  $\text{Fe}_3\text{C}/\text{C}$  samples. For every concentration of  $\text{H}_2\text{O}_2$ , the content of the supernatant solution was <1 ppm, confirming that the  $\text{Fe}_3\text{C}$  nanoparticles are protected from oxidation.

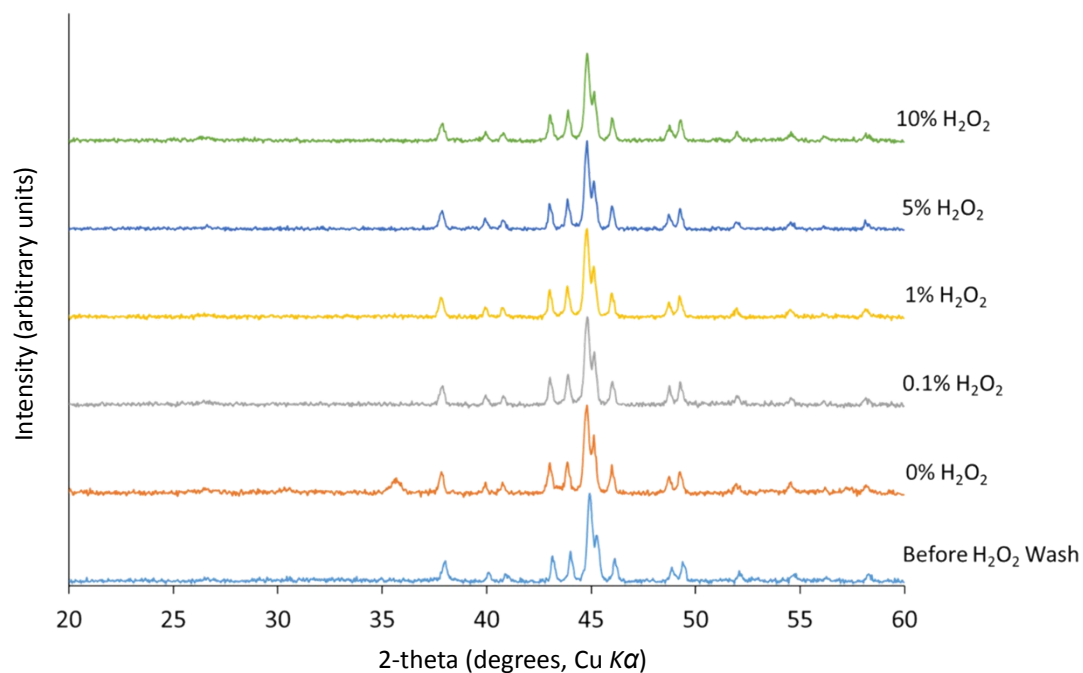

**Figure S2** X-ray diffraction patterns of  $\text{Fe}_3\text{C}$  sample after washing with  $\text{H}_2\text{O}_2$  at various concentrations, showing that the hydrogen peroxide does not appear to affect the iron carbide in the sample.

### 2.3 Supplementary SQUID data

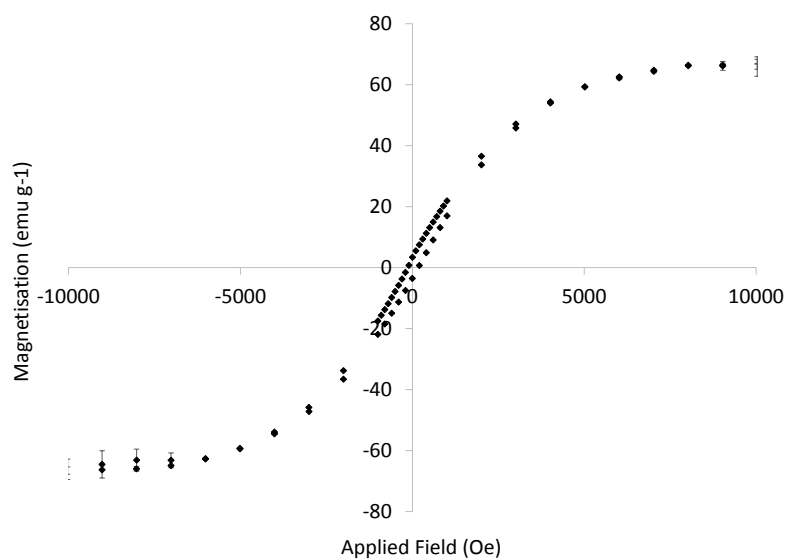

**Figure S3** Plot of the field dependence of the isothermal magnetization at 300 K for a sample of MgO-cast  $\text{Fe}_3\text{C}$  nanopowder.

## 2.4 SAXS/WAXS analysis

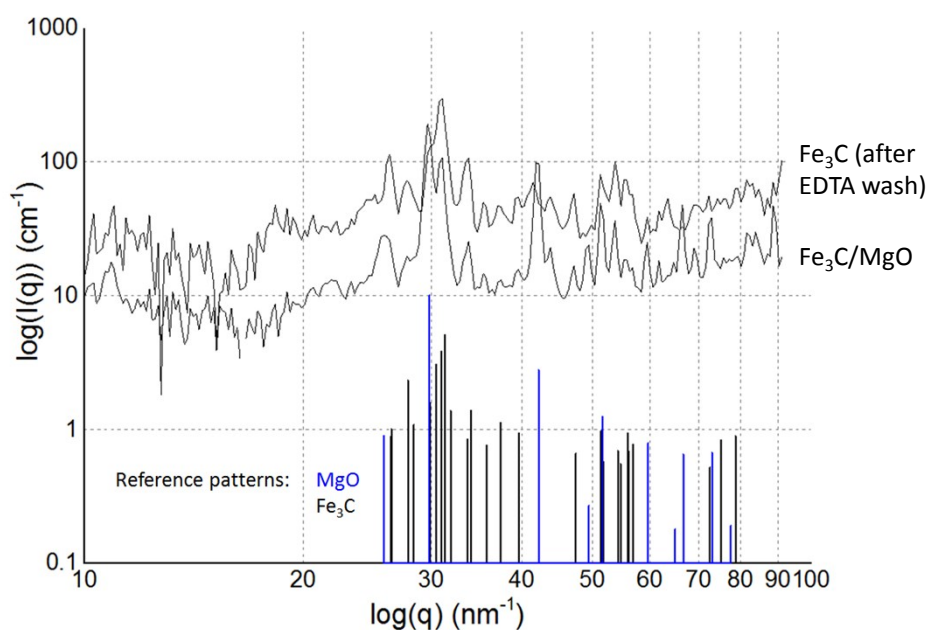

**Figure S4** Wide-angle X-ray scattering data for samples of  $\text{Fe}_3\text{C}/\text{MgO}$  and  $\text{Fe}_3\text{C}$ , with the corresponding reference patterns.

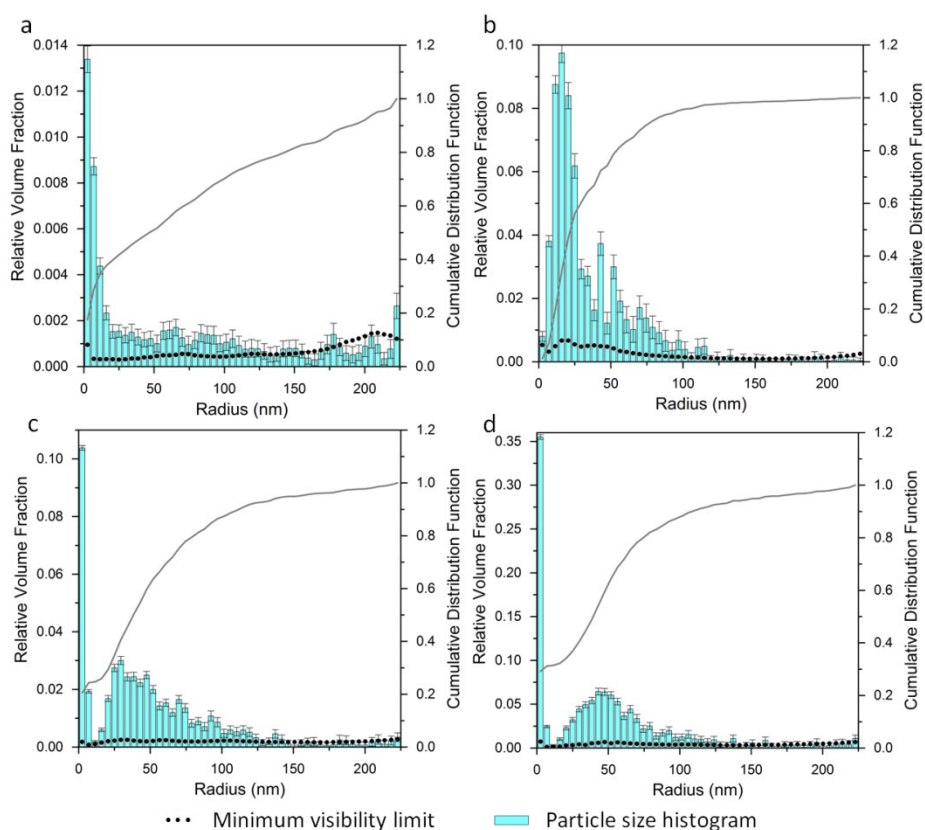

**Figure S5** Particle size histograms coupled with visibility limits (black dots, left y-axis) and cumulative distribution functions (right y-axis) plotted on a linear x-axis for a) Prussian Blue/MgO, b)  $\text{Fe}_3\text{C}/\text{MgO}$ , c)  $\text{Fe}_3\text{C}$  (after EDTA treatment) and d)  $\text{Fe}_3\text{C}$  (after EDTA then  $\text{H}_2\text{O}_2$  treatment).

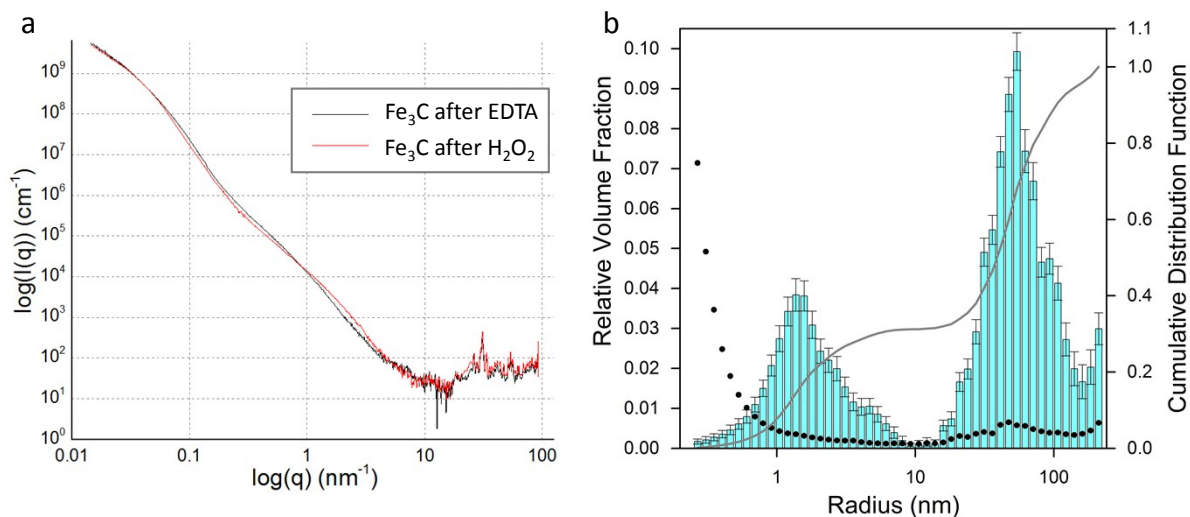

**Figure S6** (a) SAXS and WAXS data fit for  $\text{Fe}_3\text{C}$  nanoparticles after EDTA and  $\text{H}_2\text{O}_2$  treatment and (b) size distribution data for the sample after  $\text{H}_2\text{O}_2$  treatment.

## 2.5 Scaled-up synthesis for preparation of a ferrofluid

Large samples of dispersible  $\text{Fe}_3\text{C}$  nanoparticles were prepared as described in the experimental section of the main paper by grinding commercial soluble Prussian blue powder with commercial  $\text{MgO}$  nanopowder. TEM images (below) confirmed that the resulting  $\text{Fe}_3\text{C}$  material is still nanoparticulate.

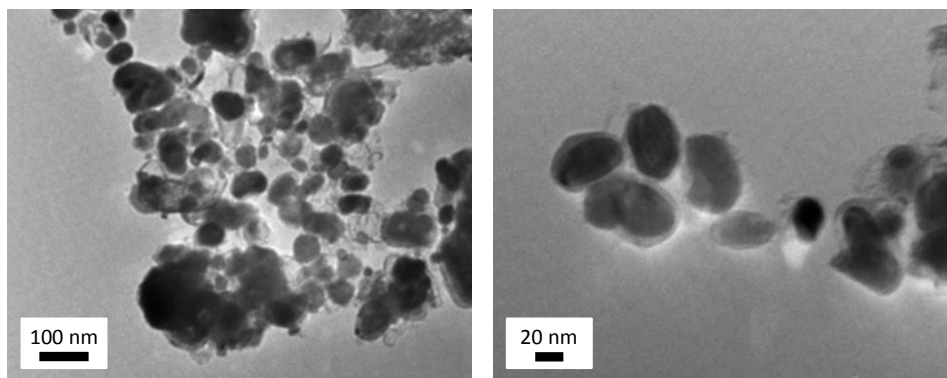

**Figure S7** TEM images of  $\text{Fe}_3\text{C}$  powder prepared by a scaled-up synthesis, showing that nanoparticles are still formed.

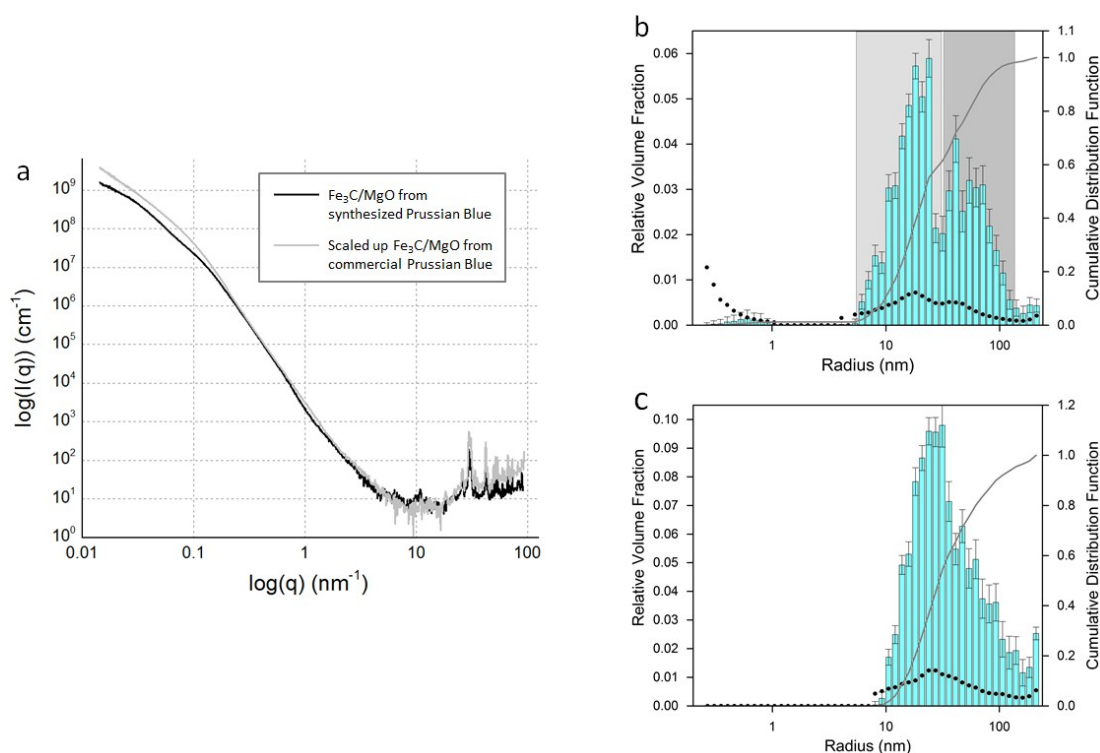

**Figure S8** a) SAXS and WAXS data for samples of  $\text{Fe}_3\text{C}/\text{MgO}$  prepared from as-synthesized Prussian blue and commercial Prussian blue (larger scale synthesis). Also corresponding size distribution histograms for b) the small scale and c) large scale samples.

## 2.6 Preparation of a ferrofluid

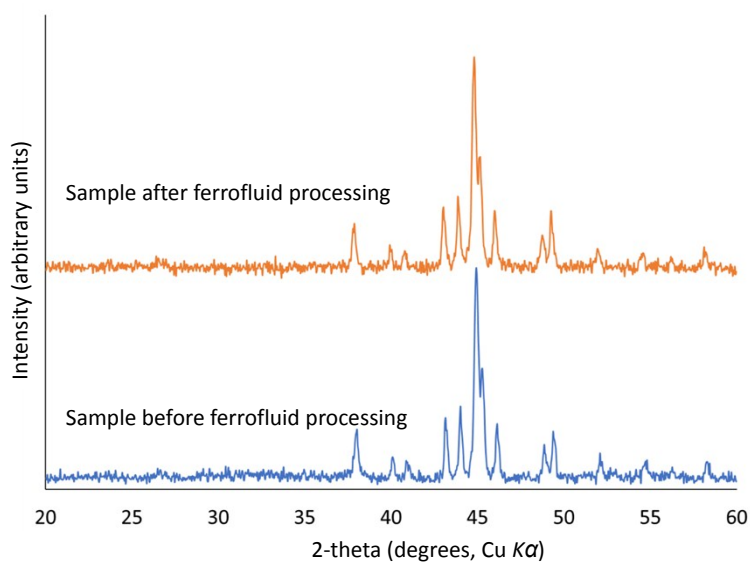

**Figure S9** X-ray diffraction patterns of  $\text{Fe}_3\text{C}$  sample before and after processing to produce a ferrofluid, showing that there is no effect on the crystalline material from the ferrofluid preparation method.

## References

---

<sup>1</sup> J. Filik, A.W. Ashton, P.C.Y. Chang, P.A. Chater, S.J. Day, M. Drakopoulos, M.W. Gerring et al., Processing two-dimensional X-ray diffraction and small-angle scattering data in DAWN 2, *Journal of applied crystallography* 50 (2017) 959–966.

<sup>2</sup> B.R. Pauw, A.J. Smith, T. Snow, N.J. Terrill, A.F. Thünemann, The modular small-angle X-ray scattering data correction sequence, *Journal of applied crystallography* 50 (2017) 1800–1811.
